# Supplementary material for: CSF1R inhibition delays cervical and mammary tumor growth in murine models by attenuating the turnover of tumor-associated macrophages and enhancing infiltration by CD8+ T cells
Source: PubMed Central journal article supplement — Oncoimmunology. 2013 Dec 4;2(12):e26968. doi: 10.4161/onci.26968 (PMC3902121; doi:10.4161/onci.26968), 2013-12-04

## **Supplemental Material to:**

**Debbie C Strachan, Brian Ruffell, Yoko Oei, Mina Bissell<sup>4</sup>,  
Lisa M Coussens, Nancy Pryer, and Dylan Daniel**

**CSF1R inhibition delays cervical and mammary tumor  
growth in murine models by attenuating the turnover of  
tumor-associated macrophages and enhancing infiltration  
by CD8<sup>+</sup> T cells**

**Oncolmunology 2013; 2(12)**

**<http://dx.doi.org/10.4161/onci.26968>**

**[http://www.landesbioscience.com/journals/oncoimmunology/  
article/26968/](http://www.landesbioscience.com/journals/oncoimmunology/article/26968/)**

**Supplemental Figure 1.** Characterization of tumor-associated macrophages in the PyMT allograft model. Spontaneous tumors from MMTV-PyMT mice were pooled and digested to form a single-cell suspension. One million cells were implanted into a single mammary fat pad in syngeneic mice. Tumor allografts were digested and analyzed by flow cytometry. Gating strategy to identify macrophages in tumors. Gating was performed in sequence from left to right. Gates are outlined in pink. Cell surface expression of F4/80 and MHCII in CD45<sup>+</sup>CD11b<sup>+</sup>Ly-6G/C(Gr-1)<sup>-/lo</sup> cells to identify two distinct (MHCII<sup>hi</sup> and MHCII<sup>lo</sup>) TAM subpopulations. Histogram overlays show intracellular staining of IL-10 and cell surface expression of CD206 in MHCII<sup>hi</sup> (dark blue) and MHCII<sup>lo</sup> (light blue) TAM subpopulations. Isotype control-stained cells are shown as a solid histogram.

**Supplemental Figure 2.** Structure and activity of BLZ945, a CSF1R inhibitor. Chemical structure and biochemical profiling of BLZ945, a highly selective and potent CSF1R inhibitor.

**Supplemental Figure 3.** The CSF1R pathway regulates at least two regulatory TAM populations in mammary tumors. A, Pseudocolor dot plot showing cell surface-staining of F4/80 and MHCII in CD45<sup>+</sup>CD11b<sup>+</sup>Ly-6G/C(Gr-1)<sup>-/lo</sup> cells from spontaneous tumors in MMTV-PyMT transgenic mice. Two F4/80<sup>+</sup> populations (MHCII<sup>hi</sup> and MHCII<sup>lo</sup> TAMs) are boxed in magenta. Histogram overlay showing intracellular staining of IL-10 and cell-surface staining of CD206 in MHCII<sup>hi</sup> (dark blue) and MHCII<sup>lo</sup> (light blue) TAM subpopulations. Isotype control-stained cells are represented by the solid histogram. B, MMTV-PyMT transgenic mice were dosed with BLZ945 or vehicle (n = 4 per group) for 6 days. Spontaneous tumors were analyzed as described in Fig. 1A, using MHCII staining to separate out IL-10<sup>+</sup> TAM subpopulations. Data is quantified in C. D-E, Repopulation of MHCII<sup>hi</sup> and MHCII<sup>lo</sup> TAM subpopulations in mammary tumors over a period of 6 days following a 6-day treatment with BLZ945 (n = 4 per group). All graphs

show mean values, error bars represent SEM. \* $p < 0.05$  versus vehicle, unpaired t-test, two-tailed.

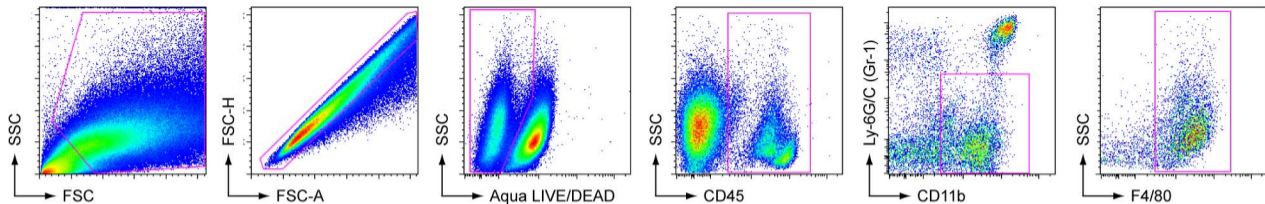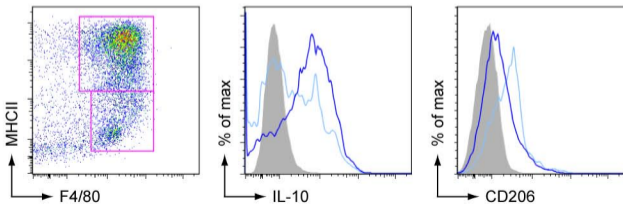

- CD45<sup>+</sup>CD11b<sup>+</sup>Ly-6G/C(Gr-1)<sup>-lo</sup>F4/80<sup>+</sup>MHCII<sup>hi</sup> cells
- CD45<sup>+</sup>CD11b<sup>+</sup>Ly-6G/C(Gr-1)<sup>-lo</sup>F4/80<sup>+</sup>MHCII<sup>lo</sup> cells

*shown are CD45<sup>+</sup>CD11b<sup>+</sup>Ly-6G/C(Gr-1)<sup>-lo</sup> cells*

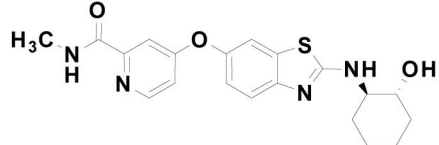

### Biochemical Activity

|        |          |
|--------|----------|
| CSF-1R | 0.001 mM |
| PDGFRb | 5.86 mM  |
| PDGFRA | >10 mM   |
| cKit   | 3.88 mM  |
| Flt3   | >10 mM   |

### Invitrogen Kinase Panel

>10 mM 220 kinases

### Cellular Target Modulation

|                                    |      |
|------------------------------------|------|
| p-CSF-1R (MNFS-60)                 | 0.05 |
| p-MEK <sup>217/221</sup> (MNFS-60) | 0.06 |
| p-CSF-1R (monocytes)               | 0.11 |
| p-PDGFRb (HVSMC)                   | 1.2  |
| p-cKit (Mo7E)                      | >8   |

### Cell Proliferation

|                 |          |
|-----------------|----------|
| MNFS-60 (M-CSF) | 0.067 mM |
| HVSMC (PDGF)    | 8.7 mM   |
| Mo7e (SCF)      | >10 mM   |

NVP-BLZ945-AA-3 @ 1000nM

CSF-1R, PDGFR a & b

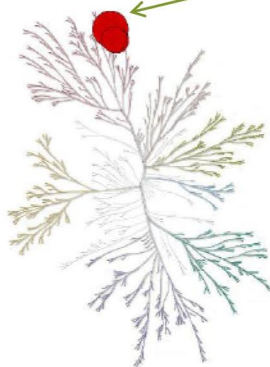

Percent Control

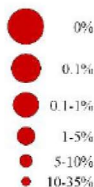

### Biochemical Selectivity Profiling

Colors:  
IC50 in  $\mu$ M  
Colored by Individual Auto Range

|             |       |             |
|-------------|-------|-------------|
| Red         | Green | Light Green |
| 0.001       | 3.2   | 4.8         |
| Green       | 9.1   | 10          |
| Light Green | 10    | 25          |

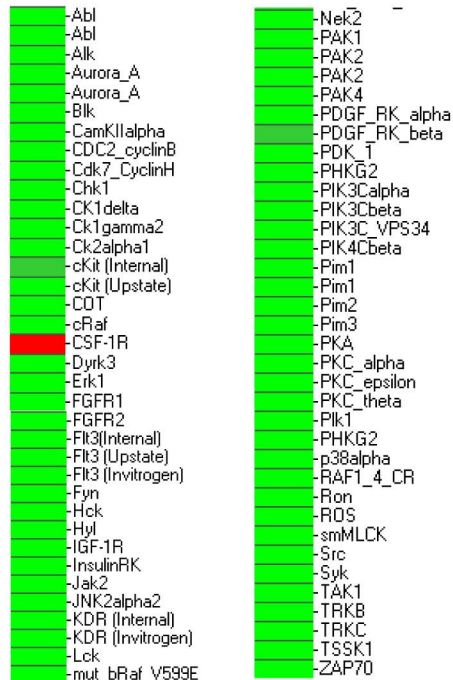

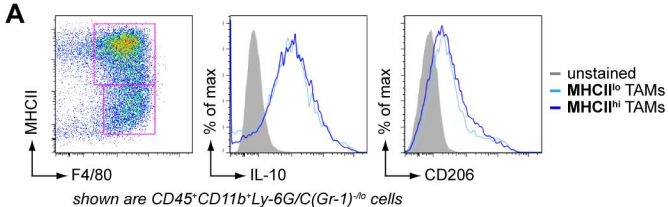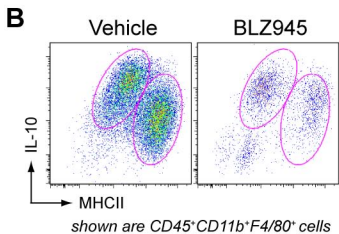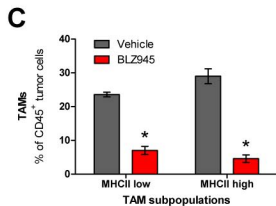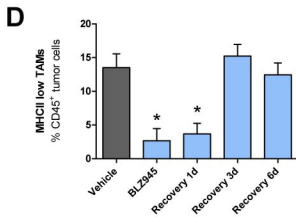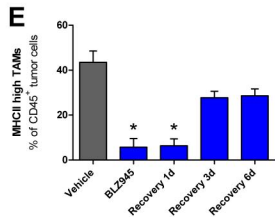

Supplement: onci-2-e26968-s01.pdf [file onci-2-e26968-s01.pdf]
